# Supplementary material for: A trichostatin A expression signature identified by TempO-Seq targeted whole transcriptome profiling
Source: PLoS One. 2017 May 25;12(5):e0178302. doi: 10.1371/journal.pone.0178302 (PMC5444820; doi:10.1371/journal.pone.0178302)
Supplement: S1 Table — The average number of mapped reads is listed for each level of purified RNA input and each level of cells input as lysates. (XLSX) [file pone.0178302.s005.xlsx]

## Sheet: S2 Table Reads per Sample by In
ng RNA per Assay	Avg Total Mapped Reads		Cells per Assay	Avg Total Mapped Reads
100	2166510		4000	13157144
10	1788789		400	5980547
1	1281853		40	984726
0.1	286729		4	153182
0.01	40724		0.4	19420
0.001	6099		0.04	3753
0.0001	2032		0.004	2433
0	2865		0.0004	2556
